# Supplementary material
Source: bioRxiv or medRxiv preprint supplement (https://www.biorxiv.org/highwire/filestream/96629/field_highwire_adjunct_files/0/314922-1.pdf)

Total glucose consumed before division

Lag time  $\times f$   
(mmol glucose/g DCW)

1

0

0

0.5

1

1.5

Time-integrated feedrate,  $f$  (mmol/g/h)

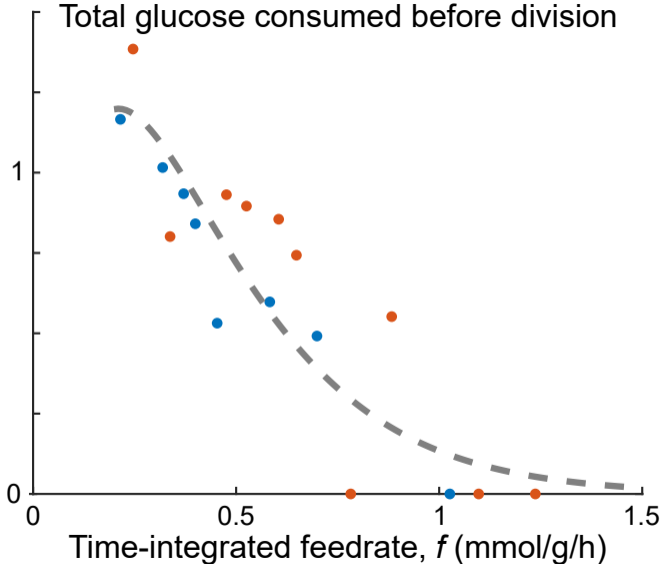

Supplement: Supplementary file [file 314922-1.pdf]
